# Supplementary material for: Investigating the Allosteric Regulation of YfiN from Pseudomonas aeruginosa: Clues from the Structure of the Catalytic Domain
Source: PubMed Central journal article supplement (PMC3838380; doi:10.1371/journal.pone.0081324), 2013-11-22
Supplement: pone.0081324.s004.pdf [file pone.0081324.s004.pdf]

YfiN\_gi|15596317/

α1 α2 α3 β1

20 30 40 50 60 70 80 90 100

YfiN\_gi|15596317/

gi 429215191

gi 409431160

gi 104779939

gi 386013870

gi 431804466

gi 167035659

gi 325274367

gi 398846123

gi 170719950

gi 707342441

gi 425897387

gi 398938828

gi 398881430

gi 407366637

gi 398898773

gi 398870651

gi 398962796

gi 398852880

gi 398983107

gi 774569201

gi 330807376

gi 423693563

gi 388467615

gi 229592594

gi 395650879

gi 312963036

gi 395498759

gi 402702397

gi 421781556

gi 448240438

gi 157368918

gi 293392949

gi 440229366

gi 123440952

gi 238786644

gi 238797532

gi 238782711

gi 238761920

gi 238794811

gi 238752235

gi 150260515

gi 395761940

gi 253998107

gi 430810339

gi 113868485

gi 194290118

gi 402568159

gi 421870480

gi 171315481

gi 390568145

gi 393779677

gi 421495894

consensus>90

YfiN\_gi|15596317/

β2 α4 β3 β4 α5 α6 α7

110 120 130 140 150 160 170 180 190 200

YfiN\_gi|15596317/

gi 429215191

gi 409431160

gi 104779939

gi 386013870

gi 431804466

gi 167035659

gi 325274367

gi 398846123

gi 170719950

gi 707342441

gi 425897387

gi 398938828

gi 398881430

gi 407366637

gi 398898773

gi 398870651

gi 398962796

gi 398852880

gi 398983107

gi 774569201

gi 330807376

gi 423693563

gi 388467615

gi 229592594

gi 395650879

gi 312963036

gi 395498759

gi 402702397

gi 421781556

gi 448240438

gi 157368918

gi 293392949

gi 440229366

gi 123440952

gi 238786644

gi 238797532

gi 238782711

gi 238761920

gi 238794811

gi 238752235

gi 150260515

gi 395761940

gi 253998107

gi 430810339

gi 113868485

gi 194290118

gi 402568159

gi 421870480

gi 171315481

gi 390568145

gi 393779677

gi 421495894

consensus>90

YfiN\_gi|15596317/ TT n2 α8 α9 β5 α10

210 220 230 240 250 260 270 280 290 300

YfiN\_gi|15596317/ R R D P F E K V V P F A G T A E L S Q L G F D F N A E L D E L E S Q A R L Q D E N A S A H A Q Q H H D S H S F E F F A F F E F G R S R A L R D A N E H R E Q A A V L F I T I D R F K A T I T R L G H  
gi|429215191 R R D Q P S R R V P S A R I A R E L D E L E G G D F N A E L D E L E A Q O H L R R E N A S A H A Q Q H H D S H S F E F F A F F E F G R S R T L R E L A Q R G E H L A L L F I L I S D D R F K A T I T R L G H  
gi|409431160 R R S P F D R V P P A A Q I A R E L N E L L G N D F N A E L D E L E S Q O H L Q S E N E S A H A Q Q H H D S H S F E F F A F F E F G R S R T L R N R A D K H O E H L A L L F I L I S D D R F K A T I T R L G H  
gi|104779939 R R S P F D R V P P E T I Q I A R E L N E L L G N D F N A E L D E L E S Q O H L Q S E N E S A H A Q Q H H D S H S F E F F A F F E F G R S R T L R N A A R Q O E H L A L L F I L I S D D R F K A T I T R L G H  
gi|386013870 R R S P F D R V P P E A P I A R E L N E L L G N D F N A E L D E L E V W H S H L Q S E N O T I A H A Q Q H H D S H S F E F F A F F E F G R S R S V L N A A R Q O E H L A L L F I L I S D D H F K A T I T R L G H  
gi|431804466 R R R P F D R V P P E A P I A R E L N E L L G N D F N A E L D E L E V W H S H L Q N E N A T I A H A Q Q H H D S H S F E F F A F F E F G R S R S V R N A A R Q O E H L A L L F I L I S D D H F K A T I T R L G H  
gi|167035659 R R S P F D R V P P E A P I A R E L N E L L G N D F N A E L D E L E V W H S H L Q S E N O T I A H A Q Q H H D S H S F E F F A F F E F G R S R S V R N A A R Q O E H L A L L F I L I S D D H F K A T I T R L G H  
gi|325274367 R R S P F D R V P P E T A I A R E L N E L L G N D F N A E L D E L E V W H S H L Q N E N A T I A H A Q Q H H D S H S F E F F A F F E F G R S R S V R N A A S Q O E H M A L L F I L I S D D H F K A T I T R L G H  
gi|398846123 R R S P F D R V P P E A P I A R E L N E L L G N D F N A E L D E L E V W H S H L Q N E N A T I A H A Q Q H H D S H S F E F F A F F E F G R S R S C L R N A A R Q O E H L A L L F I L I S D D H F K A T I T R L G H  
gi|170719950 R R S P F D R V P P O A P I A R E L N E L L G N D F N A E L D E L E V W H S H L Q N E N A T I A H A Q Q H H D S H S F E F F A F F E F G R S R S V R N A A R Q O E H M A L L F I L I S D D H F K A T I T R L G H  
gi|707342441 R R R A P D Q R V P P A E I A R E L D N L M L G N D F N A E L D E L E A A Q O H L Q S E N E T I A H A Q Q H H D S H S F E F F A F F E F G R I R A L R S A N K K L N E R M A V A L F I L I S D D S D R F K A T I T R L G H  
gi|425897387 R R R A P D V R V P P A E I A R E L D N L M L G N D F N A E L D E L E A A Q O H L Q S E N E T I A H A Q Q H H D S H S F E F F A F F E F G R I R A L R S A K K L N E R M A V A L F I L I S D D S D R F K A T I T R L G H  
gi|398938828 S R R A P D Q R V P P A A I A R E L D N L M L G N D F N A E L D E L E S Q O H L Q S E N E T I A H A Q Q H H D S H S F E F F A F F E F G R I R A L R N A N K K L N E Q V A V L F I L I S D D S D R F K A T I T R L G H  
gi|398881430 S R R A P D Q R V P P A D I A R E L D N L M L G N D F N A E L D E L E S Q O H L Q S E N E T I A H A Q Q H H D S H S F E F F A F F E F G R I R A L R N A N K K L N E Q V A V L F I L I S D D S D R F K A T I T R L G H  
gi|407366637 S D R A P D R R V P P A D I A R E L D N L M L G N D F N A E L D E L E S Q O H L Q S E N E T I A H A Q Q H H D S H S F E F F A F F E F G R M R A L R N A H K K L N E R V A V L F I L I S D D S D R F K A T I T R L G H  
gi|398898773 S R R A P D Q R V P P A D I A R E L D N L M L G N D F N A E L D E L E S Q O H L Q S E N E T I A H A Q Q H H D S H S F E F F A F F E F G R M R A L R N A K K L D E R V A V L F I L I S D D S D R F K A T I T R L G H  
gi|398870651 S D R A P D K R V P P A D I A R E L D N M F G I D F N A E L D E L E S Q O H L Q S E N E T I A H A Q Q H H D S H S F E F F A F F E F G R M R A L R N A N K K L E R V A V L F I L I S D D S D R F K A T I T R L G H  
gi|398962796 S R R A L D R R V P P A Q I A R E L D N L M L G N D F N A E L D E L E S Q O H L Q S E N E T I A H A Q Q H H D S H S F E F F A F F E F G R I R A L R N A G K K L N E R V A V L F I L I S D D S D R F K A T I T R L G H  
gi|398852880 S R R A L D R R V P P A Q I A R E L D N L M L G N D F N A E L D E L E S Q O H L Q S E N E T I A H A Q Q H H D S H S F E F F A F F E F G R I R A L R S G G K K L N E R V A V L F I L I S D D S D R F K A T I T R L G H  
gi|398983107 S R R A L D R R V P P A Q I A R E L D N L M L G N D F N A E L D E L E S Q O H L Q N E N A T I A H A Q Q H H D S H S F E F F A F F E F G R I R A L R N A S K K H D E R V A V L F I L I S D D S D R F K A T I T R L G H  
gi|77456920 S R R A L D R R V P P A Q I A R E L D N L M L G N D F N A E L D E L E S Q O H L Q S E N E T I A H A Q Q H H D S H S F E F F A F F E F G R I R A L R N A S K K L N E Q V A V L F I L I S D D S D R F K A T I T R L G H  
gi|330807376 S R R A L D R R V P P A A I A R E L D N L M L A N D F N A E L D E L E S Q O H L Q S E N E T I A H A Q Q H H D S H S F E F F A F F E F G R I R A L R N A S K K L N E R V A V L F I L I S D D S D R F K A T I T R L G H  
gi|423693563 S R R D P D R R V P P A E I A R E L D S L G S G D F N A L G E M C A A Q O H L Q S E N E T I A H A Q Q H H D S H S F E F F A F F E F G R I R A L R S A A K V N E R V A V L F I L I S D D S D R F K A T I T R L G H  
gi|388467615 S R R D P D R R V P P A Q I A R E L D S L G S G D F N A L G E M A A Q O H L Q S E N E T I A H A Q Q H H D S H S F E F F A F F E F G R I R A L R S A A K V N E R V A V L F I L I S D D S D R F K A T I T R L G H  
gi|229592594 S R R D P D R R V P P A Q I A R E L D S L G S G D F N A L G E M A A Q O H L Q S E N E T I A H A Q Q H H D S H S F E F F A F F E F G R I R A L R S A A K A K E Q V A V L F I L I S D D S D R F K A T I T R L G H  
gi|395650879 S R R D P D R R V P P A R I A R E L D S L G S G D F N A L G E M A A Q O H L Q S E N E T I A H A Q Q H H D S H S F E F F A F F E F G R I R A L R S A A K A N E R V A V L F I L I S D D S D R F K A T I T R L G H  
gi|312963036 S R R D P D R R V P P A R I A R E L D N L M L G S G D F N A L G E M C V Q O H L Q S E N E T I A H A Q Q H H D S H S F E F F A F F E F G R I R A L R S A A K A K E Q V A V L F I L I S D D S D R F K A T I T R L G H  
gi|395498759 S R R A P D R R V P P A Q I A R E L D N L M L G N D F N A E L D E M A A Q O H L Q S E N E T I A H A Q Q H H D S H S F E F F A F F E F G R I R A L R S A A K L N E K V A V L F I L I S D D S D R F K A T I T R L G H  
gi|402702397 R D R A P D R R V P P A H I A R E L D S L G N D F N A E L D E L E S Q O H L Q N E N A T I A H A Q Q H H D S H S F E F F A F F A A R A L T L R T L N K P G D K V A V L F I L I S D D S D R F K A T I T R L G H  
gi|421781556 I D R T P G L R V P S A P I A R E L H E L S S D F N G L D E L E A A Q A H L K Q E N D S T H E H A F F E F G R S R A L G D I O P T K K L A V L F I L I S D D R F K A T I T R L G H  
gi|448240438 R D R T P G L R V P S A P I A R E L H E L S S D F N G L D E L E A A Q A H L K Q E N D S T H E H A F F E F G R S R A L G D I E P P A K L A V L F I L I S D D R F K A T I T R L G H  
gi|157368918 R D R A P F L R V P S A P I A R E L H E L S S D F N G L D E L E A A Q A H L K Q E N D S T H E H A F F E F G R S R A L G D I E P P A K L A V L F I L I S D D R F K A T I T R L G H  
gi|293392949 R D R T P G L R V P S A P I A R E L H E L S S D F N G L D E L E A A Q A H L K Q E N D S T H E H A F F E F G R S R A V S D S D A T T K K L A V L F I L I S D D R F K A T I T R L G H  
gi|440229366 S D R S F G Q R V P S A P I A R E L H E L S S D F N G L E E L E A T A Q A H L K Q E N D S T H E H A F F E F G R S R A L N H I A A E E K L A V L F I L I S D D R F K A T I T R L G H  
gi|123440952 R H S S F G Q R V P S A Q I A R E L N E L S H D F N G L E E L E V W Q K H L T Q E N D S T H E H A F F E F G R S R T L S D C K T N E H V A V L F I L I S D D R F K A T I T R L G H  
gi|238786644 R H S S F G Q R V P S A K I A R E L N E L S S D F N G L E E L E V W Q K H L T Q E N D S T H E H A F F E F G R S R T L K D C K T N E H V A V L F I L I S D D R F K A T I T R L G H  
gi|238797532 R H S S F G Q R V P S A K I A R E L N E L S S D F N G L E E L E V W Q K H L T Q E N D S T H E H A F F E F G R S R T L S D C K P S H A A V L F I L I S D D R F K A T I T R L G H  
gi|238782711 R H S S F G Q R V P S A K I A R E L N E L S S D F N G L E E L E V W Q K H L T Q E N D S T H E H A F F E F G R S R T L N D C K S D H A A V L F I L I S D D R F K A T I T R L G H  
gi|238761920 R H S S F G Q R V P S A Q I A R E L N E L S S D F N G L E E L E V W Q K H L T R E N D S T H E H A F F E F G R S R I L N D C K T N H A A V L F I L I S D D R F K A T I T R L G H  
gi|238794811 R H S S F G Q R V P S A K I A R E L N E L S S D F N G L E E L E V W Q K H L T Q E N D S T H E H A F F E F G R S R T L S D C A A D E Q L A V L F I L I S D D R F K A T I T R L G H  
gi|238752235 R H S S F G Q R V P S A Q I A R E L N E L S S D F N G L E E L E V W Q K H L T Q E N D S T H E H A F F E F G R S R T L K E C K S K E H A A V L F I L I S D D R F K A T I T R L G H  
gi|150260515 R H S S F G Q R V P S A K I A R E L N E L S S D F N G L E E L E V W Q K H L T Q E N D S T H E H A F F E F G R S R T L N D C O P G E H A V L F I L I S D D R F K A T I T R L G H  
gi|395761940 Q Y R S F E L L V P P A N I A R E L N Q I N D F N A L D E L E A A Q K H L T Q E N D S T H E H A F F E F G R S E A F M E A I E C A L L E A R V G T K V A V L F I L I S D D R F K A T I T R L G H  
gi|253998107 Q Y R S F G L R A P P A N I A R E L N Q I N D F N A M D E L A T Q R H V K R E H D S T H E H A F F E F G R S L L E S S E H A V R D A R F H S N A V A M F M M A V A V L F I L I S D D R F K A T I T R L G H  
gi|430810339 S R R A P F Q R M P P A R I A R E L N A L S E D F N G L D E L E A A Q N Q L Q H E N R S A H A Q Q H H D S H S F E F F A F F A A F T A A L D A V R T A A A R N Y A V A V L Y L S D D D F K A T I T R L G H  
gi|113868485 S K R D F A Q R T P P A S I A R E L N A L S E D F N G L D E L O T M Q H E N R S A H A Q Q H H D S H S F E F F A F F A A F V A A E H A V R H A A A N D Y A V A V L Y L S D D D F K A T I T R L G H  
gi|194290118 S O R D F A Q R T P P A S I A R E L N A L S E D F N G L D E L O T M Q H E N R S A H A Q Q H H D S H S F E F F A F F A A F V A A E H A V R H A A A N D Y A V A V L Y L S D D D F K A T I T R L G H  
gi|402568159 R E R A F A R V E V P S A A I A R E L N Q L G D F N A L D E F E E M Q N T L R D E N A S E H E H A Q Q H H D S H S F E F F A F F V O F E S R I S V A L C D A V V T G R V A V L Y L S D D D F K A T I T R L G H  
gi|421870480 R E R A F A R V E V P S A A I A R E L N Q L G D F N A L D E F E E M Q N T L R D E N A S E H E H A Q Q H H D S H S F E F F A F F V O F E S R I S V A L C D A T L V T G R V A V L Y L S D D D F K A T I T R L G H  
gi|171315481 R E R A P G R V E V P S A V I A R E L N Q L G D F N A L D E F E G M Q N T L R E A N S E H E H A Q Q H H D S H S F E F F A F F A Q F E S R I S V A L C G R V V T R G R V A V L Y L S D D D F K A T I T R L G H  
gi|390568145 R E R A P G R V E V P S A V I A R E L N Q L G D F N A L D E F E G M Q N T L R E A N S E H E H A Q Q H H D S H S F E F F A F F A Q F E S R I S A S L S A A A V T G R V A V L Y L S D D D F K A T I T R L G H  
gi|39377967 R E R A F N R R V P D S Q H L E L H A L G G D F N A L D E L E D W N F R M S E K A S L T H E H A Q Q H H D S H S F E F F A F F O N E A L F V E R I N A A M M H A R T E T G E R V A V L Y L S D D S F K A T I T R L G H  
gi|421495894 R Q R A L K Q R V V P A N I A R E L H A L G F D F N S L D E L E A A Q A H Q K R E N A S L L E H A Q Q H H D S H S F E F F A F F A L E A R E Q A I Q A G H T R H E R F A V L Y L S D D S F K A T I T R L G H  
consensus>90 ..R...Rvp.a.laEL...l.DFN.LSdELE.Wq...l.en..L.h.A.HD.LTg.L.NR...fe.r.L.....e..A.%\$D.D.FK.I.ND..GH

YfiN\_gi|15596317/ α11 β6 β7 α12 β8 β9 β10 α13

310 320 330 340 350 360 370 380 390 400

YfiN\_gi|15596317/ A A G D T V I V N T A M E I R G O L I H D S D V A A R G G G D E F A V L L A P L A S G A D A L R I A D N T I T A S Q A P T R F S D G S T V S T S L T T C A L V E P H A D T P A A T L H D A D A M Y I A  
gi|429215191 A A G D T V I V N T A M E I R G O L I H D S D V A A R G G G D E F A V L L A P L P D S R A A L R V A D N T I T A S A A P I A L P D G S S I S T S L S V G I A L Y P D H G R T L A E L H R A D A M Y O A  
gi|409431160 A A G D T V I S V A E R V R A Q I E E D D D V A A R G G G D E F A V L L A P L P H T R D E A L R I A E K I I A A S K L P I O L P S E G R S I T S L S L S I A Y F P D D G R S P S D L N A D A M Y O A  
gi|104779939 A A G D T V I S V A E R V R A Q I E E D D D V A A R G G G D E F A V L L A P L Q A R E D A E R I A E K I I V A S K L P I O L E D G N S I T S L S L S I A Y F P D D G Q D P S D L N A D A M Y O A  
gi|386013870 A A G D T V I S V A E R V R A Q I E E D D D V A A R G G G D E F A V L L T P L H T R K D A E H I A E K I I V A S K L P V O L D S G L S V S T S L S V G I A Y F P D D G A D P A S L N A D A M Y O A  
gi|431804466 A A G D T V I S V A E R V R A Q I E E D D D V A A R G G G D E F A V L L T P L H S R K D A E H I A E K I I V A S K L P V O L D S G R S I A T S L S V G I A Y F P D D G A D P A S L N A D A M Y O A  
gi|167035659 A A G D T V I S V A E R V R A Q I E E D D D V A A R G G G D E F A V L L T P L Q S R K D A E H I A E K I I V A S K L P V O L D S G R S I A T S L S V G I A Y F P D D G A D P A S L N A D A M Y O A  
gi|325274367 A A G D T V I S V A E R V R A Q I E E D D D V A A R G G G D E F A V L L T P L Q T R R D A E H I A E K I I V A S K L P V O L D S G R S V A T S V S V G I A Y F P D D G A D P A S L N A D A M Y O A  
gi|398846123 A A G D T V I N V A D E R V R A Q I E E D D D V A A R G G G D E F A V L L T P L Q S R E D A E R I A D K I I T S A L P I O L D S G S S I T S L S V G I A Y F P D D G S D P A L D A D A M Y O A  
gi|170719950 A A G D T V I N V A D E R V R A Q I E E D D D V A A R G G G D E F A V L L T P L H R I E D A E R I A D K I I T S A L P I O L D S G S S I T S L S V G I A Y F P D H G T P C G L N A D A M Y O A  
gi|707342441 A A G D T V I V A T E R V R A Q I E E D D D V A A R G G G D E F A V L L T P L H R I E D A E R I A D K I I T S A L P I O L D S G S S I T S L S V G I A Y F P D H G T P C G L N A D A M Y O A  
gi|425897387 A A G D T V I M A V A T E R V R A Q I E E D D D V A A R G G G D E F A V L L T P L H R I E D A E R I A D K I I T S A L P I O L D S G S S I T S L S V G I A Y F P D H G T P C G L N A D A M Y O A  
gi|398938828 A A G D T V I V A V A N E R V R A Q I E E D D D V A A R G G G D E F A V L L T P L H K I E D A E R I A D K I I T S A L P I O L D S G S S I T S L S V G I A Y F P D H G A T P C G L N A D A M Y O A  
gi|398881430 A A G D T V I V A V A N E R V R A Q I E E D D D V A A R G G G D E F A V L L T P L H K T E D A E R I A D K I I T S A L P I O L D S G S S I T S L S V G I A Y F P D H G A T P C G L N A D A M Y O A  
gi|407366637 A A G D T V I V A V A N E R V R A Q I E E D D D V A A R G G G D E F A V L L T P L H K T E D A E R I A D K I I T S A L P I O L D S G S S I T S L S V G I A Y F P D H G A T P C G L N A D A M Y O A  
gi|398898773 A A G D T V I V A V A N E R V R A Q I E E D D D V A A R G G G D E F A V L L T P L H K T E D A E R I A D K I I T S A L P I O L D S G S S I T S L S V G I A Y F P D H G A T P C G L N A D A M Y O A  
gi|398870651 A A G D T V I V A V A N E R V R A Q I E E D D D V A A R G G G D E F A V L L T P L H K T E D A E R I A D K I I T S A L P I O L D S G S S I T S L S V G I A Y F P D H G A T P C G L N A D A M Y O A  
gi|398962796 A A G D T V I V A V A N E R V R A Q I E E D D D V A A R G G G D E F A V L L T P L H K I E D A E R I A D K I I T S A L P I O L D S G S S I T S L S V G I A Y F P D H G A T P C G L N A D A M Y O A  
gi|398852880 A A G D T V I V A V A N E R V R A Q I E E D D D V A A R G G G D E F A V L L T P L H R I E D A E R I A D K I I T S A L P I O L D S G S S I T S L S V G I A Y F P D H G A T P C G L N A D A M Y O A  
gi|398983107 A A G D T V I V A V A N E R V R A Q I E E D D D V A A R G G G D E F A V L L T P L H K V E D A E R I A D K I I T S A L P I O L D S G S S I T S L S V G I A Y F P D H G A T P C G L N A D A M Y O A  
gi|77456920 A A G D T V I V A V A N E R V R A Q I E E D D D V A A R G G G D E F A V L L T P L H K T E D A E R I A D K I I T S A L P I O L D S G S S I T S L S V G I A Y F P D H G V T P C T L D A D A M Y O A  
gi|330807376 A A G D T V I T A V A T E R V R A Q I E E D D D V A A R G G G D E F A V L L A P L H K A E D A H R I A E K I I A S E M P I O L P G N A S V L T S L S I A Y F P D C A T P C T L H A D A M Y O A  
gi|423693563 A A G D T V I V A V A D E R V R A Q I E E D D D V A A R G G G D E F A V L L A P L H K A E D A H R I A D K I I T S A L P I O L P G N A S V L T S L S I A Y F P D C A T P C T L N A D A M Y O A  
gi|388467615 A A G D T V I V A V A D E R V R A Q I E E D D D V A A R G G G D E F A V L L A P L H K A E D A H R I A D K I I T S A L P I O L P G G T Q V L T S L S I A Y F P D H G A T P C T L N A D A M Y O A  
gi|229592594 A A G D T V I V A V A E R V R A Q I E E D D D V A A R G G G D E F A I L L A P L H K V E D A E R I A D K I I T S A L P I O L P G N T Q V L T S L S I A Y F P D H G A T P C T L N A D A M Y O A  
gi|395650879 A A G D T V I V A V A E R V R A Q I E E D D D V A A R G G G D E F A I L L A P L H K V E D A Q R I A D K I I T S A L P I O L P G D A Q V F T S L S I A Y F P D H G A T P C T L N A D A M Y O A  
gi|312963036 A A G D T V I V A V A N E R V R A Q I E E D D D V A A R G G G D E F A I L L A P L H S L E D A R R I A D K I I T S A L P I O L P G S A Q V L T S L S I A Y F P D H G A T P C T L N A D A M Y O A  
gi|395498759 A A G D T V I V A V A N E R V R A Q I E E D D D V A A R G G G D E F A I L L S P L H K L E D A Q R I A D K I I T S A L P I O L P G D T Q V L T S L S I A Y F P D H G A T P C T L N A D A M Y O A  
gi|402702397 A A G D T V I T T L A G E R V R A Q I E E D D D V A A R G G G D E F A I S L T P L H R I E D A E R I A D K I I T S A L P I O L P D S S H V V T S L S I A Y F P D H A T P C T L C A D A M Y O A  
gi|421781556 A A G D T V I T T L A G E R V R A Q I E E D D D V A A R G G G D E F A V L L A P V H S T E D V L Q I A D N I I D C T O P V I L P N D E A V I T S L S I A Y F P D H A V T P G L L H B A D A M Y O A  
gi|448240438 A A G D T V I T T L A G E R V R A Q I E E D D D V A A R G G G D E F A V L L A P V H S T E D V L Q I A D N I I D C T O P V I L P N D E T V I T S L S I A Y F P D H A S T P G L L H B A D A M Y O A  
gi|157368918 A A G D T V I T T L A G E R V R A Q I E E D D D V A A R G G G D E F A V L L A P V H T T E D V L Q I A D N I I D C T O P V I L P N D E A V I S S L S I A Y F P D H A A T P G L L H B A D A M Y O A  
gi|293392949 A A G D T V I T T L A G E R V R A Q I E E D D D V A A R G G G D E F A V L L A P I Y H T D D V L I A D N I I D C T O P V I L P N E Q O M V L S L S I A Y F P D H A A T P G L L H B A D A M Y O A  
gi|440229366 A A G D T V I T T L A D E R F A L S E S D D V A A R G G G D E F A V L L A P I V R R Q A D V T H I A D N I I S S A P V A L P L P N Q Q V I A S L S I A Y F P D H A A T P G L L H B A D A M Y O A  
gi|123440952 A A G D T V I T T L A D E R F A L S E S D D V A A R G G G D E F A V L L A P I Y H T D D V L I A D N I I K S C O P I L P D G S E I T S S L S I A Y F P D H A Q T P D E L O R A D A M Y O A  
gi|238786644 A A G D T V I T T L A D E R F A L S E S D D V A A R G G G D E F A V L L A P I H N T D D V L I A D N I I K S C O P I L V L D G I E I T S L S I A Y F P D H A Q T P D E L O R A D A M Y O A  
gi|238797532 A A G D T V I T T L A D E R F A L S E S D D V A A R G G G D E F A V L L A P I H K T D D V L L A S N I I E S C O P I L A D D G R E I T S L S I A Y F P D H A Q T P D E L O R A D A M Y O A  
gi|238782711 A A G D T V I T T L A D E R F A L S E S D D V A A R G G G D E F A V L L A P I H E T D D V L I A N I I E S C O P I L I A D G I E I T S L S I A Y F P D H A Q T P D E L O R A D A M Y O A  
gi|238761920 A A G D T V I T S L A D E R F A L S E S D D V A A R G G G D E F A V L L A P I H N T D D V L T A N I I K S C O P I L V L S D G Q E I T S L S I A Y F P D H A Q T P D E L O R A D A M Y O A  
gi|238794811 A A G D T V I T S L A D E R F A L S E S D D V A A R G G G D E F A V L L A P I H N T D D V L T A N I I K S C O P I L D V D G S E I T S I S I A Y F P D H A Q T P D E L O R A D A M Y O A  
gi|238752235 A A G D T V I T T L A Y E R F A L S E S D D V A A R G G G D E F A V L L A P I H N T D D V L T A N I I D S N O P I D V D G S E I T S I S I A Y F P D H A Q T P D E L O R A D A M Y O A  
gi|150260515 A A G D T V I T T L A Y E R F A L S E S D D V A A R G G G D E F A V L L T P I N L D D V L T A D H I I D S A L P I L A E G C E I T V S L S I A Y F P D H A Q T P P K L O R A D A M Y O A  
gi|395761940 A S G D T V I T T L A Y E R F A L S E S D D V A A R G G G D E F A V L L K P L R S S D A M H I A D N I I A A Q A T E L P T G S I I V S S L S I A Y F P D H A I D A E S V A A D A M Y O A  
gi|253998107 A A G D T V I K I W A L E R S G G C G S V A R G G G D E F A A L L K P I K H A E D A V H I A E H I A Q A S A P I T P N G E L I T C S V T I A Y F P D H A R T A G L L A A D A M Y O A  
gi|430810339 A A G D T V I V A V G O E R F A S G C G S V A R G G G D E F A V L N A A L R A P E D A V R I A E H I I N A A T P V C L A D G T T I F A P L S I A Y F P D H A R N G T L H S A D A M Y O A  
gi|113868485 A A G D T V I V A V A N E R F A S G C G S V A R G G G D E F A V L A A A L R A P R D A I H I A E H I I Q A M S A P I D P D G S T V Q A S L S I A Y F P V H A Q G S O L L H A D A M Y O A  
gi|194290118 A A G D T V I V G L A E R F T Q T R G S V A R G G G D E F A V L L A A L R A P R D A I O I A E H I I Q A M S A P I D P D G S V Q A S L S I A Y F P V H A Q G S O L L H A D A M Y O A  
gi|402568159 D A G D T V I V G L A E R F T Q T R G S V A R G G G D E F A V M L A P V R E A D S V C R I A D E I L S G M V P S I E L S D G R M V A T M L S I A Y F P D H A S D A S G L R A D A M Y O A  
gi|421870480 D A G D T V I V G L A E R F T Q T R G S V A R G G G D E F A V M L A P V R E A G S V C R I A D E I L S G M V P S I E L S D G R V V A T M M S I A Y F P D H A S D A S G L R A D A M Y O A  
gi|171315481 D A G D T V I V I A T A E R F T Q T R G S V A R G G G D E F A V M L G T V R P E D S V C R I A D E I L S G M V P S I E L P D G R M V A T M M S I A Y F P D H A S D A N G L R A D A M Y O A  
gi|390568145 E A G D T V I V I A T A E R F T Q T R G S V A R G G G D E F A V M L A P M E D A A S A R E I A E G L L S A M P I V L P D G R T V A T M M S I A Y F P D H A C A D V A G L R A D A M Y O A  
gi|39377967 E A G D T V I V I A T A E R F T Q T R G S V A R G G G D E F A I M L A P M E D A S A R E I A D A H I L S S M A P I V L P D G G E I T A S L S I A Y F P D H E G T S H L L H A D A M Y O A  
gi|421495894 A T G D E V I I A L A R R V Q H O L E M D M C R G G G D E F V I L L S E V H Q E S E V R E V M M R I I Q A A P T E V V L S D G H H L Q I G V S G C A L F E Q G G T A E V L L O F A D A M Y E S  
consensus>90 a.GD.VL...va.R...lRe.D.Var.LGGDEFavll.p.....Iad.i...M.pi.l.....v...lsGiA.%Fd.....Ll..AD.AMY.a

yfiN\_gi|15596317/ 0000 <sup>B11</sup>  
410

yfiN\_gi|15596317| RQARGSRRLAELND.....  
gi|429215191| RRGRGMRSLAGEDTDSNTEDYKEIARDSQAPE  
gi|409431160| RNLRGQQQMAE.....  
gi|104779939| RKRRRGHWQVAQ.....  
gi|386013870| RKRRRGHWQVAQ.....  
gi|431804466| RKRRRGHWQVAQ.....  
gi|167035659| RKRRRGHWQVAQ.....  
gi|325274367| RKRRRGHWQVAQ.....  
gi|398846123| RKRRRGQWQAAQ.....  
gi|170719950| RMRRRGQWQAAQ.....  
gi|70734241| RGSRGQHTVGAEPPIVQVQN.....  
gi|425897387| RVSRGGQHTAGSEPPVV.....  
gi|398938828| RLNRGAQHTAGSEHP.....  
gi|398881430| RFSRGAQHTSGSEHP.....  
gi|407366637| RLNRGAQHTSGAEPH.....  
gi|398898773| RLNRGAQHTAGAEFP.....  
gi|398870651| RLNRGAQHTAGSEHP.....  
gi|398962796| RLNRGAQHTAGSESPVV.....  
gi|398852880| RLNRGAQHTAGSEHLVDP.....  
gi|398983107| RLNRGAQHTAGAEHP.....  
gi|77456920| RLNRGAQHTAGSEHP.....  
gi|330807376| RLNRGAQHTAGAEHP.....  
gi|423693563| RLNRGAQHTAGSEHPVV.....  
gi|388467615| RLNRGAQHTAGSEHPVV.....  
gi|229592594| RLNRGAQHTAGSEHPVV.....  
gi|395650879| RLNRGAQHTAGSEHPVV.....  
gi|312963036| RFAQGGQQTAE.....  
gi|395498759| RLNRGAQHTAGSEHP.....  
gi|402702397| RLNRGAQHTAGSEHP.....  
gi|421781556| HRYNGGWRLA.....  
gi|448240438| HRYNGGWRLA.....  
gi|157368918| HRYNGGWRLA.....  
gi|293392949| HRYNGGWRLA.....  
gi|440229366| HRYNGGWRLA.....  
gi|123440952| KGFRPCE.QGTAYQSDYIYSENKYPES.....  
gi|238786644| KGFRPSE.P.....  
gi|238797532| KNISGGGRVIAHLS.....  
gi|238782711| KNFQSSGGRAIAQPSD.....  
gi|238761920| KGFR.....  
gi|238794811| K.....  
gi|238752235| K.....  
gi|150260515| KNFRSGKRI.....  
gi|395761940| QAQRGTRQVARSPQP.....  
gi|253998107| DQERGS.....  
gi|430810339| RQSGATWHSAESAPP.....  
gi|113868485| RRSRGTWQSAEPRL.....  
gi|194290118| RRSRGTWQSAEPRL.....  
gi|402568159| RARPGTWQLAE.....  
gi|421870480| RARPGTWQLAE.....  
gi|171315481| RTRPGTWQLAE.....  
gi|390568145| RARPGSWQFAE.....  
gi|393776967| RLGPGRWLADTGSGLLSE.....  
gi|421495894| RQRR.....  
consensus>90 K.....
